# Supplementary material for: Intelligence and socioeconomic position in childhood in relation to frailty and cumulative allostatic load in later life: the Lothian Birth Cohort 1936
Source: HighWire-hosted journal article supplement (doi:10.1136/jech-2015-205789), 2015-12-23
Supplement: jech-2015-205789supp.pdf [file jech-2015-205789supp.pdf]

## Supplementary table

Percentage of study participants in the high-risk quartile of each component of the allostatic load measure according to frailty status

| High-risk quartile             | Not frail (n=404) | Pre-frail (n=410) | Frail (n=62) | P value |
|--------------------------------|-------------------|-------------------|--------------|---------|
| Systolic blood pressure        | 56.7              | 56.8              | 77.4         | 0.006   |
| Diastolic blood pressure       | 56.9              | 57.5              | 79.0         | 0.003   |
| HbA1c                          | 18.6              | 30.6              | 51.6         | <0.001  |
| Triglycerides                  | 32.7              | 46.1              | 64.5         | <0.001  |
| HDL to total cholesterol ratio | 22.8              | 23.1              | 17.1         | 0.640   |
| BMI                            | 14.6              | 30.3              | 46.7         | <0.001  |
| Fibrinogen                     | 21.8              | 34.2              | 43.6         | <0.001  |
| Albumin                        | 31.7              | 36.4              | 43.6         | 0.117   |
